# Supplementary material for: Global organization of phenylpropanoid and anthocyanin pathways revealed by proximity labeling of trans-cinnamic acid 4-hydroxylase in Petunia inflata petal protoplasts
Source: Front Plant Sci. 2024 Sep 19;15:1295750. doi: 10.3389/fpls.2024.1295750 (PMC11446795; doi:10.3389/fpls.2024.1295750)
Supplement: Supplementary file 2 [file Table1.xlsx]

## Sheet: Ark1
Supplentary Table 1: Primers used in this study
Primer name	Sequence
C4H-F	ATGGATCTTCTCCTTTTAGAGAAGAC	To pull out gene from cDNA
C4H-R	TTAAAAAGATCTTGGTTTCATAACAATGG	To pull out gene from cDNA
C4Hb-F	ATGGATCTTCTCTTATTAGAGAAGACC	To pull out gene from cDNA
C4Hb-R	GAAAGATCTTGGTTTCAGCACAATG	To pull out gene from cDNA
AN9-F	ATGGTTGTGAAAGTGCATGGTTC	To pull out gene from cDNA
AN9-R	AAATTTTGCTTCTTCTTTAGCTGGG	To pull out gene from cDNA
CYP51-F	ATGGAGTTAGCCGGGGATAAC	To pull out gene from cDNA
CYP51-R	TGGAGGCAGCCGCTTTTTAG	To pull out gene from cDNA
C4H-TB-F	CAGGCGGCCGCACTAGTGATATCATGGATCTTCTCCTTTTAGAGAAGAC	Proximity labeling (Gibson cloning)
C4H-TB-R	CTGAACCGCCTCCACCACCACTaaaagATCTTGGTTTCATAACAATGG	Proximity labeling (Gibson cloning)
TB-F	CCATTGTTATGAAACCAAGATcttttAGTGGTGGTGGAGGCGGTTCAGGAGGTGGC	Proximity labeling (Gibson cloning)
TB-EGFP-R	GAACAGCTCCTCGCCCTTGCTCACCATaccgctACCTCCGCC	Proximity labeling (Gibson cloning)
TB-R	ACCTGCAGTGTCTGCGATTTACTTTTCGGCAGACCGCAGAC	Proximity labeling (Gibson cloning)
C4H-CnVe-attB1-F	ggggacaagtttgtacaaaaaagcaggctCCatggatcttctccttttagagaag	BiFC (Gateway cloning)
C4H-CnVe-attB2-R	ggggaccactttgtacaagaaagctgggtCaaaagatcttggtttcataacaatg	BiFC (Gateway cloning)
SbCYP79-CnVe-attB1-F	ggggacaagtttgtacaaaaaagcaggctCCATGGCGACAATGGAGGTAGAG	BiFC (Gateway cloning)
SbCYP79-CnVe-attB2-R	ggggaccactttgtacaagaaagctgggtCGATGGAGATGGACGGGTAGAG	BiFC (Gateway cloning)
AN9-CnVe-attB1-F	ggggacaagtttgtacaaaaaagcaggctCCAtggttgtgaaagtgcatgg	BiFC (Gateway cloning)
AN9-CnVe-attB2-R	ggggaccactttgtacaagaaagctgggtCaaattttgcttcttctttagctgg	BiFC (Gateway cloning)
C3Ha-CcVe-SpeI-F	CATCGTACTGACTGCGACTAGTATGGCTATTTCCTTAGCTGTCG	BiFC (Gibson cloning)
C3Ha-CcVe-XhoI-R	GACCTGAAGTTACCTCGAGACTCATATCAACAGCACCGAATGG	BiFC (Gibson cloning)
C4Hb-CcVe-SpeI-F	CATCGTACTGACTGCGACTAGTATGGATTTGTTGCTACTAGAAAAGAC	BiFC (Gibson cloning)
C4Hb-CcVe-XhoI-R	GACCTGAAGTTACCTCGAGACTGAATGATCTTGGCTTCAAGACG	BiFC (Gibson cloning)
A3'MT-CcVe-SpeI-F	CATCGTACTGACTGCGACTAGTATGACTGGTAAGACCGCTCATC	BiFC (Gibson cloning)
A3'MT-CcVe-XhoI-R	GACCTGAAGTTACCTCGAGACTTGACAATCTTCTACACAAGGTCAGAC	BiFC (Gibson cloning)
A3'5'MT-CcVe-SpeI-F	CATCGTACTGACTGCGACTAGTATGGCTGGTAAGTCTGGTCAC	BiFC (Gibson cloning)
A3'5'MT-CcVe-XhoI-R	GACCTGAAGTTACCTCGAGACTGTTCAATCTTCTACCCAAGGTTAAACC	BiFC (Gibson cloning)
DFRa-CcVe-SpeI-F	CATCGTACTGACTGCGACTAGTATGGCTTCCGAAGCTGTCC	BiFC (Gibson cloning)
DFRa-CcVe-XhoI-R	GACCTGAAGTTACCTCGAGACTAACTTCAACGTTGGTCAACA	BiFC (Gibson cloning)
SbCYP71-CcVe-SpeI-F	CATCGTACTGACTGCGACTAGTatggccaccaccgcca	BiFC (Gibson cloning)
SbCYP71-CcVe-XhoI-R	GACCTGAAGTTACCTCGAGACTggcggcgcggcggtt	BiFC (Gibson cloning)
