# Supplementary material for: Global organization of phenylpropanoid and anthocyanin pathways revealed by proximity labeling of trans-cinnamic acid 4-hydroxylase in Petunia inflata petal protoplasts
Source: Front Plant Sci. 2024 Sep 19;15:1295750. doi: 10.3389/fpls.2024.1295750 (PMC11446795; doi:10.3389/fpls.2024.1295750)
Supplement: Supplementary file 3 [file Table2.xlsx]

## Sheet: Ark1
Supplementary Table 2: List of significantly enriched proteins in C4H-TurboID vs. WT samples, timepoint = 0h. Significance cutoff: adjusted p-value < 0.05. Highlighted are the proteins hits selected for BiFC experiments.
ID	Annotated protein name	log2 fold-change
Bait	C4H-TurboID	10.8
Peinf101Scf00763g05002.1	Sterol 14-demethylase (CYP51)	8.78
Peinf101Scf01631g01033.1	Nodulin-related protein 1	7.87
Peinf101Scf02326g01044.1	Protein PAT1 homolog 2	6.87
Peinf101Scf00838g06013.1	NA	6.59
Peinf101Scf00151g10003.1	Heme-binding-like protein At3g10130, chloroplastic	6.23
Peinf101Scf01857g02017.1	Hsp70-Hsp90 organizing protein	6.22
Peinf101Scf01166g07038.1	Phospholipase D beta 1	5.49
Peinf101Scf00251g13014.1	Fructose-bisphosphate aldolase 6, cytosolic	4.83
Peinf101Scf00951g08008.1	Trans-cinnamate 4-monooxygenase C4H1 (C4Ha)	4.68
Peinf101Scf02980g00010.1	Cycloartenol-C-24-methyltransferase 1	4.63
Peinf101Scf00175g15013.1	Calcium-dependent lipid-binding protein	4.59
Peinf101Scf00554g06001.1	Pyruvate kinase, cytosolic isozyme	4.52
Peinf101Scf00594g17025.1	VAMP-like protein YKT61	4.29
Peinf101Scf00633g00018.1	Probable linoleate 9S-lipoxygenase 5	4.27
Peinf101Scf00022g04043.1	Protein HOMOLOG OF MAMMALIAN LYST-INTERACTING PROTEIN 5	4.26
Peinf101Scf01077g02016.1	Probable protein phosphatase 2C 58	4.14
Peinf101Scf01163g00015.1	Calcium-transporting ATPase 2, plasma membrane-type	4.12
Peinf101Scf03806g00033.1	Trans-cinnamate 4-monooxygenase C4H2 (C4Hb)	4.09
Peinf101Scf01786g07035.1	Protein ROOT HAIR DEFECTIVE 3	4
Peinf101Scf01482g05031.1	TOM1-like protein 1	3.98
Peinf101Scf03608g00001.1	3-ketoacyl-CoA synthase 3	3.91
Peinf101Scf01047g05009.1	NA	3.83
Peinf101Scf00686g01014.1	Pleiotropic drug resistance protein 1	3.82
Peinf101Scf00635g00007.1	Cytochrome P450 71A6	3.81
Peinf101Scf00091g29001.1	Prohibitin-3, mitochondrial	3.8
Peinf101Scf00264g06017.1	Peroxisome biogenesis protein 22	3.79
Peinf101Scf01057g02013.1	NA	3.73
Peinf101Scf01189g04042.1	(+)-neomenthol dehydrogenase	3.72
Peinf101Scf00199g01006.1	Cytochrome P450 76A2	3.71
Peinf101Scf01047g04003.1	Adhesive plaque matrix protein	3.62
Peinf101Scf01468g05003.1	24-methylenesterol C-methyltransferase 2	3.62
Peinf101Scf00516g06012.1	Cytochrome b5	3.57
Peinf101Scf00145g20012.1	Elongation factor 1-beta 1	3.56
Peinf101Scf00471g10021.1	Enoyl-CoA hydratase 2, peroxisomal	3.53
Peinf101Scf00261g12024.1	Acetyl-coenzyme A carboxylase carboxyl transferase subunit beta, chloroplastic	3.48
Peinf101Scf02326g00003.1	Reticulon-like protein B8	3.47
Peinf101Scf06610g00047.1	ER membrane protein complex subunit 4	3.45
Peinf101Scf00655g08010.1	ABC transporter E family member 2	3.31
Peinf101Scf00670g05005.1	Wax ester synthase/diacylglycerol acyltransferase 11	3.31
Peinf101Ctg13285958g00001.1	Cytosolic sulfotransferase 5	3.28
Peinf101Scf00300g11006.1	Heat shock cognate 70 kDa protein	3.17
Peinf101Scf00276g12026.1	60S ribosomal protein L13-1	3.16
Peinf101Scf02582g00020.1	Pyrophosphate-energized vacuolar membrane proton pump	3.16
Peinf101Scf00500g10031.1	Hypersensitive-induced reaction 1 protein	3.1
Peinf101Scf00495g06008.1	Pyrophosphate--fructose 6-phosphate 1-phosphotransferase subunit beta	3.06
Peinf101Scf00650g27060.1	Dynamin-related protein 3A	3.06
Peinf101Scf01317g04052.1	Late embryogenesis abundant protein Lea14-A	3.02
Peinf101Scf00650g23044.1	Actin-11	3.01
Peinf101Scf00653g11005.1	V-type proton ATPase subunit d2	2.97
Peinf101Scf00345g11024.1	Mitochondrial outer membrane protein porin 2	2.91
Peinf101Scf00659g02022.1	Mitogen-activated protein kinase 9	2.89
Peinf101Scf07097g00008.1	GTP-binding protein YPTM2	2.89
Peinf101Scf00559g15011.1	Plasma membrane-associated cation-binding protein 1	2.87
Peinf101Scf19669g00008.1	Photosystem II D2 protein	2.85
Peinf101Scf00686g01027.1	Pleiotropic drug resistance protein 1	2.83
Peinf101Scf04640g00025.1	Pleiotropic drug resistance protein 1	2.82
Peinf101Scf02279g01029.1	Non-symbiotic hemoglobin 1	2.8
Peinf101Scf00179g07010.1	Glucose-6-phosphate isomerase, cytosolic	2.72
Peinf101Scf00665g05023.1	Uridine 5'-monophosphate synthase	2.7
Peinf101Scf00231g17017.1	Mitochondrial outer membrane protein porin of 36 kDa	2.63
Peinf101Scf01267g04029.1	Prohibitin-1, mitochondrial	2.62
Peinf101Scf03915g00017.1	25.3 kDa vesicle transport protein	2.62
Peinf101Scf00655g11011.1	AP-4 complex subunit epsilon	2.62
Peinf101Scf00168g01001.1	Prohibitin-1, mitochondrial	2.61
Peinf101Scf00058g12012.1	Guanylate-binding protein 4	2.6
Peinf101Scf00260g12014.1	5-methyltetrahydropteroyltriglutamate--homocysteine methyltransferase	2.6
Peinf101Scf01109g04006.1	Ras-related protein RABB1c	2.56
Peinf101Scf00445g23011.1	SEC12-like protein 1	2.54
Peinf101Scf01044g06073.1	Geraniol 8-hydroxylase	2.54
Peinf101Scf01871g00007.1	Extradiol ring-cleavage dioxygenase	2.53
Peinf101Scf01468g08049.1	SEC1 family transport protein SLY1	2.5
Peinf101Scf00373g35002.1	Mitochondrial import receptor subunit TOM40-1	2.49
Peinf101Scf07318g00012.1	ABC transporter C family member 2	2.47
Peinf101Scf00120g02022.1	Branched-chain-amino-acid aminotransferase-like protein 2	2.45
Peinf101Scf00914g07043.1	Ras-related protein RABA2a	2.44
Peinf101Scf02714g00035.1	60S ribosomal protein L3	2.39
Peinf101Scf01294g01013.1	60S ribosomal protein L21-2	2.38
Peinf101Scf01077g00021.1	26S proteasome non-ATPase regulatory subunit 2 homolog B	2.37
Peinf101Scf00889g13044.1	T-complex protein 1 subunit epsilon	2.36
Peinf101Scf00434g11009.1	Cytochrome P450 89A9	2.34
Peinf101Scf03029g01029.1	Ubiquitin carboxyl-terminal hydrolase 6	2.32
Peinf101Scf00091g22003.1	Ras-related protein Rab11D	2.29
Peinf101Scf00995g01001.1	Nodulin-related protein 1	2.29
Peinf101Scf00199g15006.1	Enolase	2.28
Peinf101Scf00506g14021.1	Cytochrome P450 98A2 (C3’H)	2.27
Peinf101Scf01380g00034.1	Plasma membrane ATPase 3	2.25
Peinf101Scf00232g01016.1	Dolichyl-diphosphooligosaccharide--protein glycosyltransferase subunit 2	2.24
Peinf101Scf00889g03034.1	Glucose-6-phosphate 1-dehydrogenase, chloroplastic	2.23
Peinf101Scf00229g16011.1	Poly(U)-specific endoribonuclease-B	2.22
Peinf101Scf01889g16040.1	Alanine aminotransferase 2, mitochondrial	2.21
Peinf101Scf01786g09049.1	60S ribosomal protein L28-1	2.2
Peinf101Scf01271g05017.1	Caffeoyl-CoA O-methyltransferase 3	2.17
Peinf101Scf00009g29006.1	Coatomer subunit delta	2.16
Peinf101Ctg12523629g00001.1	Cytosolic sulfotransferase 3	2.09
Peinf101Scf02395g03053.1	Inositol hexakisphosphate and diphosphoinositol-pentakisphosphate kinase VIP2	2.06
Peinf101Scf06119g00002.1	L-ascorbate peroxidase 2, cytosolic	2.02
Peinf101Scf00007g06012.1	14-3-3-like protein C	1.96
Peinf101Scf00303g09020.1	Nuclear transport factor 2B	1.96
Peinf101Scf00337g05037.1	Mitochondrial outer membrane protein porin 2	1.96
Peinf101Scf01997g03024.1	C-terminal binding protein AN	1.96
Peinf101Scf00364g12021.1	Transketolase, chloroplastic	1.94
Peinf101Scf01996g00019.1	Biotin carboxylase 1, chloroplastic	1.94
Peinf101Scf00043g02003.1	Geraniol 8-hydroxylase	1.94
Peinf101Scf02312g02025.1	ABC transporter G family member 36	1.91
Peinf101Scf02344g00007.1	Formate--tetrahydrofolate ligase	1.9
Peinf101Scf00170g03001.1	UDP-glucose 6-dehydrogenase 1	1.89
Peinf101Scf06265g00022.1	60S ribosomal protein L14-1	1.88
Peinf101Scf01050g01004.1	Very-long-chain enoyl-CoA reductase	1.86
Peinf101Scf04432g00003.1	Lysine--tRNA ligase	1.84
Peinf101Scf00113g06019.1	Ras-related protein RABE1c	1.83
Peinf101Scf00861g02014.1	Glutathione S-transferase F11 (AN9)	1.8
Peinf101Scf00947g08014.1	Glutamine synthetase cytosolic isozyme 1-1	1.8
Peinf101Scf00969g02020.1	Transaldolase	1.78
Peinf101Scf00306g02009.1	Pre-mRNA-processing protein 40A	1.77
Peinf101Scf02279g04046.1	D-3-phosphoglycerate dehydrogenase 1, chloroplastic	1.71
Peinf101Scf00296g05002.1	Cytochrome P450 CYP73A100 (C4Hc)	1.7
Peinf101Scf00665g07032.1	Trifunctional UDP-glucose 4,6-dehydratase/UDP-4-keto-6-deoxy-D-glucose 3,5-epimerase/UDP-4-keto-L-rhamnose-reductase RHM1	1.7
Peinf101Scf01662g01008.1	8-hydroxygeraniol dehydrogenase	1.63
Peinf101Scf01889g10037.1	Heat shock 70 kDa protein 15	1.63
Peinf101Scf03526g03027.1	Regulator of nonsense transcripts 1 homolog	1.63
Peinf101Scf12523g00004.1	Pyruvate kinase, cytosolic isozyme	1.63
Peinf101Scf04103g00072.1	Nucleosome assembly protein 1;4	1.62
Peinf101Scf01533g01038.1	Alcohol dehydrogenase-like 3	1.59
Peinf101Scf00763g01022.1	ADP-ribosylation factor 2	1.57
Peinf101Scf00974g19002.1	Mitochondrial outer membrane protein porin of 34 kDa	1.56
Peinf101Scf01848g00038.1	NA	1.54
Peinf101Scf00791g07004.1	Phospho-2-dehydro-3-deoxyheptonate aldolase 2, chloroplastic	1.52
Peinf101Scf00060g09020.1	Aspartate aminotransferase 3, chloroplastic	1.48
Peinf101Scf02318g00010.1	Peptidyl-prolyl cis-trans isomerase	1.48
Peinf101Scf00400g05023.1	Flavonoid 3',5'-methyltransferase (A3’MT)	1.42
Peinf101Scf02093g03016.1	Flavonoid 3',5'-methyltransferase (A3’5’MT)	1.41
Peinf101Scf01267g01040.1	Ketol-acid reductoisomerase, chloroplastic	1.41
Peinf101Scf01057g03044.1	L-arabinokinase	1.4
Peinf101Scf00232g08024.1	Alpha-aminoadipic semialdehyde synthase	1.35
Peinf101Scf00487g04019.1	Pyruvate kinase 1, cytosolic	1.31
Peinf101Scf02085g05006.1	Peroxisomal acyl-coenzyme A oxidase 1	1.29
Peinf101Scf03119g00020.1	Uridine kinase-like protein 1, chloroplastic	1.25
Peinf101Scf02092g00024.1	Dynamin-related protein 5A	1.24
Peinf101Scf00232g10046.1	Phosphoglycerate kinase, chloroplastic	1.24
Peinf101Scf00073g04027.1	Dihydroflavonol 4-reductase (DFR)	1.16
Peinf101Scf00261g14009.1	60S ribosomal protein L23a	1.16
Peinf101Scf01804g00023.1	Phragmoplastin DRP1E	1.15
Peinf101Scf00936g05013.1	Catalase isozyme 3	1.14
Peinf101Scf00774g05003.1	2-methylpropanoate--CoA ligase CCL4	1.12
Peinf101Scf01177g00002.1	Secoisolariciresinol dehydrogenase	1.05
Peinf101Scf00364g03021.1	Serine hydroxymethyltransferase 4	0.991
Peinf101Scf00076g14015.1	Phragmoplastin DRP1E	0.981
Peinf101Scf00471g00013.1	Eukaryotic initiation factor 4A-11	0.93
Peinf101Scf01192g02040.1	Mitochondrial phosphate carrier protein 3, mitochondrial	0.926
Peinf101Scf00071g09027.1	Heat shock protein 90-2	0.883
Peinf101Scf03242g00011.1	ADP,ATP carrier protein, mitochondrial	0.858
Peinf101Scf00665g25043.1	Dynamin-2A	0.781
Peinf101Scf00665g22035.1	Elongation factor 1-gamma 2	0.754
Peinf101Scf03230g00022.1	ADP,ATP carrier protein, mitochondrial	0.72
Peinf101Scf00055g14022.1	Proteasome activator subunit 4	0.659
Peinf101Scf00049g07035.1	60S ribosomal protein L3	0.57
Peinf101Scf00256g03013.1	Coatomer subunit beta'-2	-0.663
Peinf101Scf00364g03010.1	Adenosylhomocysteinase	-0.708
Peinf101Scf00082g01011.1	40S ribosomal protein SA	-0.721
Peinf101Scf02446g00020.1	Bifunctional L-3-cyanoalanine synthase/cysteine synthase 1, mitochondrial	-0.952
Peinf101Scf00030g05012.1	Glycine dehydrogenase (decarboxylating), mitochondrial	-0.989
Peinf101Scf00633g07043.1	60S ribosomal protein L18-2	-1.06
Peinf101Scf00264g09029.1	Aconitate hydratase, cytoplasmic	-1.11
Peinf101Scf00423g05008.1	60S ribosomal protein L32-1	-1.12
Peinf101Scf01367g05017.1	Probable nucleolar protein 5-2	-1.19
Peinf101Scf00809g06022.1	Eukaryotic translation initiation factor 5B	-1.23
Peinf101Scf01427g04015.1	Succinate dehydrogenase [ubiquinone] flavoprotein subunit 1, mitochondrial	-1.29
Peinf101Scf01734g02016.1	60S ribosomal protein L13a-4	-1.32
Peinf101Scf02187g02012.1	Sister chromatid cohesion protein PDS5 homolog B-B	-1.32
Peinf101Scf10642g00004.1	Proteasome subunit beta type-4	-1.45
Peinf101Scf02381g00005.1	Succinate--CoA ligase [ADP-forming] subunit beta, mitochondrial	-1.61
Peinf101Scf00251g19015.1	Monodehydroascorbate reductase	-1.84
Peinf101Scf02485g01008.1	Histone H4	-1.9
Peinf101Ctg13480496g00003.1	Nucleolin 2	-1.95
Peinf101Scf00199g16014.1	Histone deacetylase HDT1	-1.96
Peinf101Scf00435g05001.1	H/ACA ribonucleoprotein complex subunit 4	-1.97
Peinf101Scf00766g02012.1	Isocitrate dehydrogenase [NADP]	-1.98
Peinf101Scf07361g00027.1	Formate dehydrogenase, mitochondrial	-2.06
Peinf101Scf01186g06029.1	Nucleolar protein 56	-2.1
Peinf101Scf00442g02021.1	Aspartate aminotransferase, mitochondrial	-2.31
Peinf101Scf00672g10011.1	Malate dehydrogenase	-2.69
Peinf101Scf00351g04016.1	Aminomethyltransferase, mitochondrial	-2.81
Peinf101Scf01878g01003.1	Histone H3.2	-3.61
Peinf101Scf00650g13039.1	Histone H2A.1	-4.07
