# Supplementary material for: Global organization of phenylpropanoid and anthocyanin pathways revealed by proximity labeling of trans-cinnamic acid 4-hydroxylase in Petunia inflata petal protoplasts
Source: Front Plant Sci. 2024 Sep 19;15:1295750. doi: 10.3389/fpls.2024.1295750 (PMC11446795; doi:10.3389/fpls.2024.1295750)
Supplement: Supplementary file 4 [file Table3.xlsx]

## Sheet: Ark1
Supplementary Table 3: List of significantly enriched proteins in C4H-TurboID vs. WT samples, timepoint = 180 min. Significance cutoff: adjusted p-value < 0.05. Highlighted are the proteins hits selected for BiFC experiments.
ID	blastx	log2 fold-change
Peinf101Scf01142g01025.1	Protein FAR1-RELATED SEQUENCE 6	8.63
Peinf101Scf01857g02017.1	Hsp70-Hsp90 organizing protein	7.48
Peinf101Scf00951g08008.1	Trans-cinnamate 4-monooxygenase C4H1 (C4Ha)	7.08
Peinf101Scf00838g06013.1	NA	7.05
Peinf101Scf01631g01033.1	Nodulin-related protein 1	6.81
Peinf101Scf00022g04043.1	Protein HOMOLOG OF MAMMALIAN LYST-INTERACTING PROTEIN 5	4.96
Peinf101Scf00296g05002.1	Cytochrome P450 CYP73A100 (C4Hc)	4.91
Peinf101Scf01166g07038.1	Phospholipase D beta 1	4.56
Peinf101Scf00554g06001.1	Pyruvate kinase, cytosolic isozyme	4.43
Bait	C4H-TurboID	4.03
Peinf101Scf00655g08010.1	ABC transporter E family member 2	3.72
Peinf101Scf00633g00018.1	Probable linoleate 9S-lipoxygenase 5	3.71
Peinf101Scf00264g06017.1	Peroxisome biogenesis protein 22	3.65
Peinf101Scf00303g09020.1	Nuclear transport factor 2B	3.48
Peinf101Scf01077g02016.1	Probable protein phosphatase 2C 58	3.48
Peinf101Scf00345g11024.1	Mitochondrial outer membrane protein porin 2	3.42
Peinf101Scf00231g17017.1	Mitochondrial outer membrane protein porin of 36 kDa	3.39
Peinf101Scf01889g16040.1	Alanine aminotransferase 2, mitochondrial	3.36
Peinf101Scf00229g16011.1	Poly(U)-specific endoribonuclease-B	3.25
Peinf101Scf00175g15013.1	Calcium-dependent lipid-binding protein	3.16
Peinf101Scf01047g04003.1	Adhesive plaque matrix protein	3.14
Peinf101Scf01633g10042.1	Respiratory burst oxidase homolog protein C	3.04
Peinf101Scf01294g01013.1	60S ribosomal protein L21-2	3.04
Peinf101Scf02326g00003.1	Reticulon-like protein B8	3.02
Peinf101Ctg12523629g00001.1	Cytosolic sulfotransferase 3	3
Peinf101Scf00655g11011.1	AP-4 complex subunit epsilon	3
Peinf101Scf00995g01001.1	Nodulin-related protein 1	2.97
Peinf101Scf01853g03035.1	Nucleosome assembly protein 1;2	2.97
Peinf101Scf01047g05009.1	NA	2.95
Peinf101Scf00653g11005.1	V-type proton ATPase subunit d2	2.91
Peinf101Scf01271g05017.1	Caffeoyl-CoA O-methyltransferase 3	2.8
Peinf101Scf00559g15011.1	Plasma membrane-associated cation-binding protein 1	2.66
Peinf101Scf01482g05031.1	TOM1-like protein 1	2.59
Peinf101Scf00274g00004.1	Chorismate synthase 1, chloroplastic	2.57
Peinf101Scf03029g01029.1	Ubiquitin carboxyl-terminal hydrolase 6	2.56
Peinf101Scf02395g03053.1	Inositol hexakisphosphate and diphosphoinositol-pentakisphosphate kinase VIP2	2.54
Peinf101Scf00300g11006.1	Heat shock cognate 70 kDa protein	2.39
Peinf101Scf00665g05023.1	Uridine 5'-monophosphate synthase	2.39
Peinf101Scf01317g04052.1	Late embryogenesis abundant protein Lea14-A	2.33
Peinf101Scf01543g00042.1	Trihelix transcription factor GT-3a	2.28
Peinf101Scf00120g02022.1	Branched-chain-amino-acid aminotransferase-like protein 2	2.11
Peinf101Scf02279g01029.1	Non-symbiotic hemoglobin 1	2.07
Peinf101Scf07318g00012.1	ABC transporter C family member 2	2.06
Peinf101Scf03526g03027.1	Regulator of nonsense transcripts 1 homolog	2.06
Peinf101Scf00058g12012.1	Guanylate-binding protein 4	2.02
Peinf101Scf02980g00010.1	Cycloartenol-C-24-methyltransferase 1	2.02
Peinf101Scf00251g13014.1	Fructose-bisphosphate aldolase 6, cytosolic	1.98
Peinf101Scf01786g07035.1	Protein ROOT HAIR DEFECTIVE 3	1.98
Peinf101Scf00306g02009.1	Pre-mRNA-processing protein 40A	1.97
Peinf101Ctg13285958g00001.1	Cytosolic sulfotransferase 5	1.94
Peinf101Scf01163g00015.1	Calcium-transporting ATPase 2, plasma membrane-type	1.9
Peinf101Scf03806g00033.1	Trans-cinnamate 4-monooxygenase C4H2 (C4Hb)	1.84
Peinf101Scf00516g06012.1	Cytochrome b5	1.8
Peinf101Scf00091g29001.1	Prohibitin-3, mitochondrial	1.72
Peinf101Scf00686g01014.1	Pleiotropic drug resistance protein 1	1.59
Peinf101Scf01969g05037.1	Uncharacterized protein At5g39570	1.47
Peinf101Scf00506g14021.1	Cytochrome P450 98A2 (C3’H)	1.35
Peinf101Scf00168g01001.1	Prohibitin-1, mitochondrial	1.03
Peinf101Scf01533g01038.1	Alcohol dehydrogenase-like 3	0.942
Peinf101Scf01177g00002.1	Secoisolariciresinol dehydrogenase	0.746
Peinf101Scf00061g05012.1	Putative rRNA 2'-O-methyltransferase fibrillarin 3	0.666
Peinf101Scf00633g07043.1	60S ribosomal protein L18-2	-1.01
Peinf101Scf02446g00020.1	Bifunctional L-3-cyanoalanine synthase/cysteine synthase 1, mitochondrial	-1.01
Peinf101Scf07361g00027.1	Formate dehydrogenase, mitochondrial	-1.04
Peinf101Scf00251g19015.1	Monodehydroascorbate reductase	-1.08
Peinf101Scf00672g10011.1	Malate dehydrogenase	-1.57
Peinf101Scf02381g00005.1	Succinate--CoA ligase [ADP-forming] subunit beta, mitochondrial	-1.66
Peinf101Scf10642g00004.1	Proteasome subunit beta type-4	-2.12
Peinf101Scf00351g04016.1	Aminomethyltransferase, mitochondrial	-2.88
